# Supplementary material for: YdiV regulates Escherichia coli ferric uptake by manipulating the DNA-binding ability of Fur in a SlyD-dependent manner
Source: PubMed Central journal article supplement (PMC7515728; doi:10.1093/nar/gkaa696), 2020-08-19
Supplement: gkaa696_supplemental_file.pdf [file gkaa696_supplemental_file.pdf]

1 **YdiV regulates *Escherichia coli* ferric uptake by manipulating the**  
 2 **DNA-binding ability of Fur in a SlyD-dependent manner**

3 **SUPPLEMENTARY DATA**

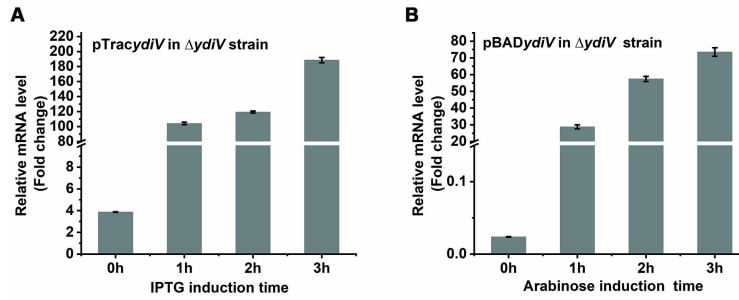

5  
 6 **Supplementary Figure S1.** Expression of *ydiV* from pTracydiV and pBADydiV plasmids  
 7 increases over time after induction. **(A)** The  $\Delta ydiV$  strain containing pTracydiV plasmid was  
 8 cultured in LB medium and induced by 0.3 mM IPTG. **(B)** The  $\Delta ydiV$  strain containing  
 9 pBADydiV plasmid was cultured in LB medium and induced by 1 mg/mL L-Arabinose. The  
 10 mRNA level of *ydiV* was tested by qRT-PCR and compared with *gapA* expression at the same  
 11 point in time. All the values shown represent mean  $\pm$  standard deviation from three  
 12 independent experiments.

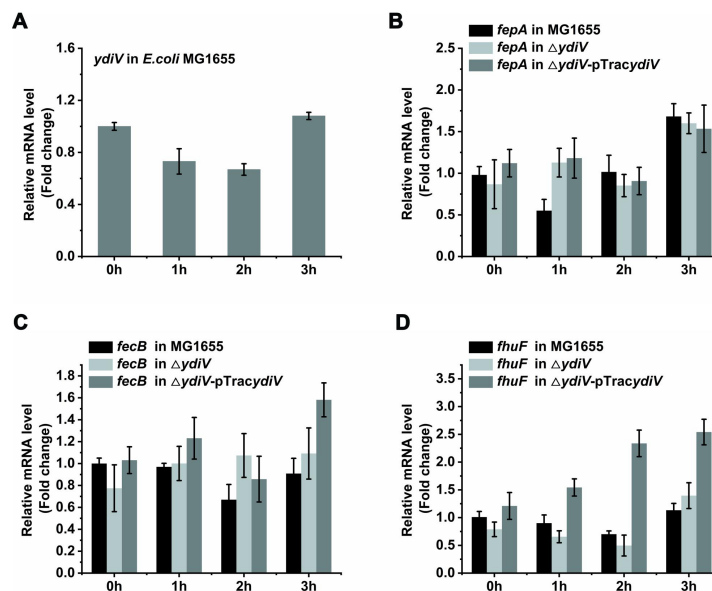

14  
 15 **Supplementary Figure S2.** *ydiV* as well as iron uptake genes show low expression under iron  
 16 sufficient condition. **(A)** The expression of *ydiV* in *E. coli*. Wild-type *E. coli* MG1655 was  
 17 cultured in LB medium to OD<sub>600</sub>=0.6, then samples were collected at 0 to 3h synchronously  
 18 with figure 1A. The amount of *ydiV* mRNA was detected by qRT-PCR and compared with 0h.  
 19 **(B–D)** The iron uptake genes expression in MG1655,  $\Delta ydiV$  and  $\Delta ydiV$ -pTracydiV strains.  
 20 Strains were cultured in LB medium to OD<sub>600</sub>=0.6, then IPTG were added for *ydiV* induction.

21 Samples were collected at 0 to 3h synchronously with figure 1B–D. The amount of *fepA*, *fecB*  
 22 and *fhuF* mRNA was detected by qRT-PCR and compared with 0h. All the values shown  
 23 represent mean  $\pm$  standard deviation from three independent experiments.

24

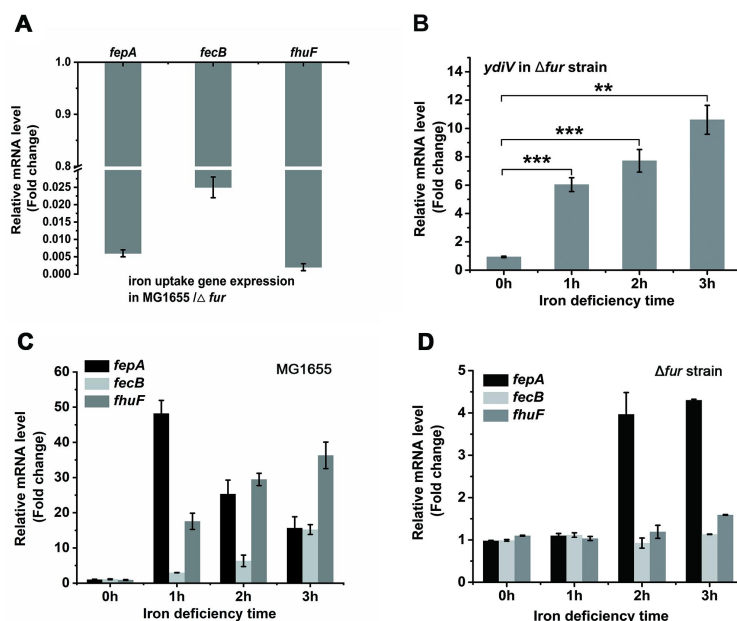

25  
 26 **Supplementary Figure S3.** The mRNA level of *ydiV* and iron uptake genes in MG1655 or  $\Delta fur$   
 27 strains. (A) In LB medium, the mRNA level of iron uptake system genes in MG1655 in  
 28 comparison with that in  $\Delta fur$  strain were detected by qRT-PCR. (B) The mRNA level of *ydiV* in  
 29  $\Delta fur$  strain before (0h) and after (1-3h) facing iron-limited environment was detected by  
 30 qRT-PCR. The expression of *ydiV* under iron deficiency in comparison with that before iron  
 31 deficiency (0h) using the *t*-test. \*\*,  $P < 0.01$ ; \*\*\*,  $P < 0.001$ . (C–D) The iron uptake genes  
 32 transcription in MG1655 and  $\Delta fur$  strain during iron deficiency induction is monitored by  
 33 qRT-PCR. 200  $\mu$ M 2,2'-dipyridyl was added in LB medium for generating iron-limited condition.  
 34 All the values shown represent mean  $\pm$  standard deviation from three independent  
 35 experiments.

36

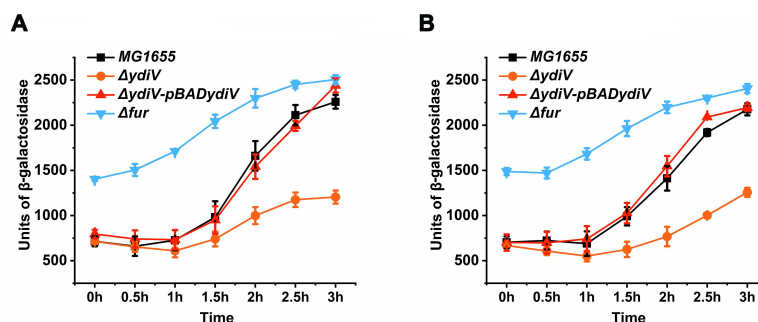

37  
 38 **Supplementary Figure S4.** The *fepA* promoter (A) and *fhuF* promoter (B) activity in iron  
 39 sufficient condition was tested by  $\beta$ -galactosidase assays. The target strain was inoculated  
 40 into LB medium and cultured until OD<sub>600</sub>=0.2. Then 0.8 mg/ml arabinose was added to activate  
 41 *ydiV* gene expression. Cultures at different induction times were reserved to detect

42  $\beta$ -galactosidase activity. The values shown as represent mean  $\pm$  standard deviation from three  
 43 independent experiments.  
 44

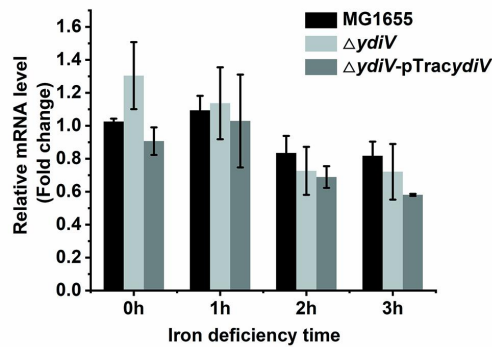

45  
 46 **Supplementary Figure S5.** The expression of *fur* in strains with different levels of YdiV. The  
 47 mRNA level of *fur* gene in MG1655,  $\Delta ydiV$  and  $\Delta ydiV$ -pTracydiV strains before (0h) and after  
 48 (1–3h) facing iron-limited environment was detected by qRT-PCR. Three biological replicates  
 49 were performed for each sample.

50

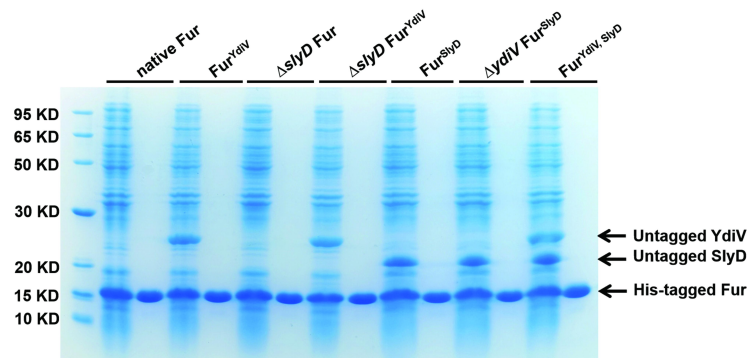

51  
 52 **Supplementary Figure S6.** The SDS-PAGE for native Fur and Fur co-expressed with YdiV or  
 53 SlyD. Protein names are marked on the top of the picture. For each set of samples, the first  
 54 lane represents the whole cell lysate of the protein-expressing strain, the second lane  
 55 represents the protein purified after Ni-NTA affinity column and Size-Exclusion  
 56 chromatography.

57

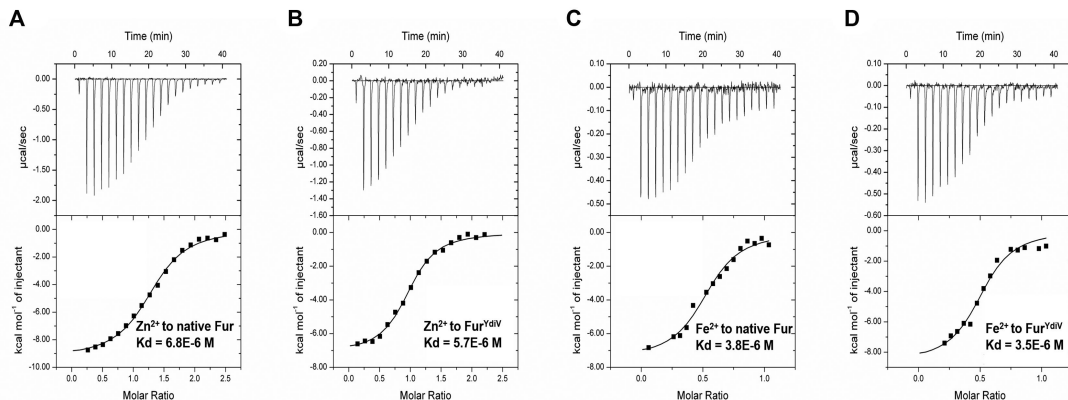

58  
 59 **Supplementary Figure S7.** Characterization of binding affinities of native Fur and Fur<sup>YdiV</sup> for  
 60 metal cofactors. The dissociation constant of Zn<sup>2+</sup> with native Fur (A), Zn<sup>2+</sup> with Fur<sup>YdiV</sup> (B),

61 Fe<sup>2+</sup> with native Fur (C) and Fe<sup>2+</sup> with Fur<sup>YdiV</sup> (D) was detected by ITC and marked in the  
 62 corresponding curve.  
 63

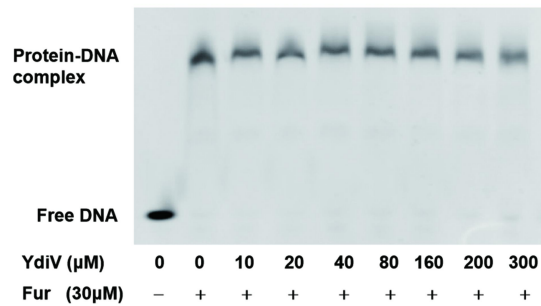

64  
 65 **Supplementary Figure S8.** EMSA for native Fur and Fur box DNA with different  
 66 concentrations of YdiV. 30 μM of Fur was mixed with different concentrations of YdiV for 10  
 67 min and then the DNA-binding ability was examined by EMSA with 25 nM FAM-labeled Fur  
 68 box DNA. The amount of YdiV added in this experiment was annotated in the figure. The  
 69 experiment was repeated three times with similar results.  
 70

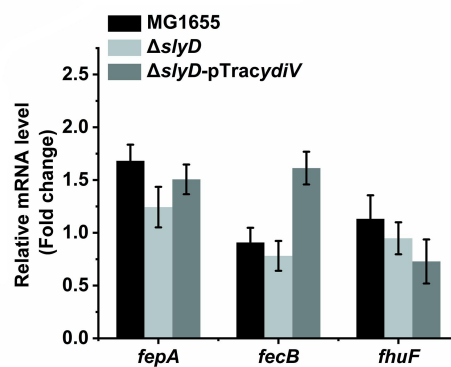

71  
 72 **Supplementary Figure S9.** The expression of iron uptake genes in MG1655, ΔslyD and  
 73 ΔslyD-pTracydiV strains during iron sufficiency. The mRNA level of *fepA*, *fecB* and *fhuF*  
 74 was monitored by qRT-PCR. Strains were cultured in LB medium to OD<sub>600</sub>=0.6, then IPTG was  
 75 added for *ydiV* induction. Samples were collected at 3h after induction. Three biological  
 76 replicates were performed.  
 77

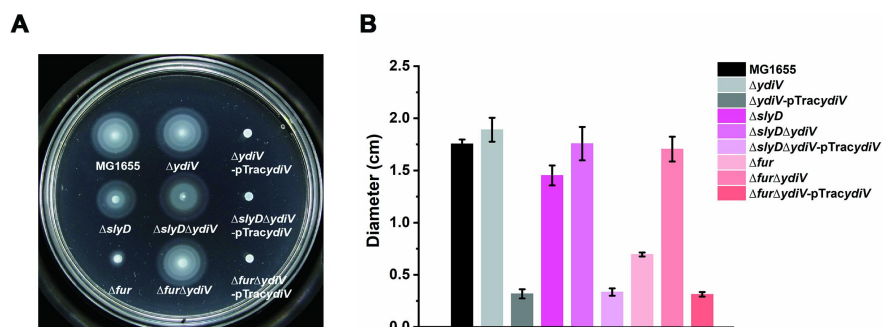

78  
 79 **Supplementary Figure S10.** The inhibition of flagella synthesis by YdiV in WT, Δfur and ΔslyD  
 80 strains. (A) 0.5 ul overnight bacterial culture was inoculated on the LB plate containing 0.2%

81 agar. (B) The diameters of bacterium colonies. Four biological replicates were performed for  
82 each sample.  
83

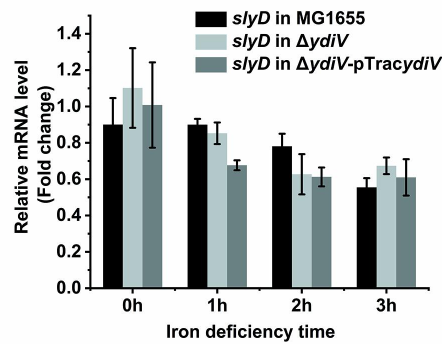

84  
85 **Supplementary Figure S11.** The expression of *slyD* in strains with different levels of YdiV.  
86 The mRNA level of *slyD* gene in MG1655,  $\Delta ydiV$  and  $\Delta ydiV$ -pTracydiV strains before (0h) and  
87 after (1–3h) facing iron-limited environment were detected by qRT-PCR. Three biological  
88 replicates were performed for each sample.

89  
90  
91  
92  
93  
94  
95  
96  
97  
98  
99  
100  
101  
102  
103  
104  
105  
106  
107  
108  
109  
110  
111  
112  
113  
114  
115

116 **Supplementary Table S1.** Bacterial strains used in this study.

| <i>E. coli</i> strain | Relevant characteristics                                                                                                                                              | Source                  |
|-----------------------|-----------------------------------------------------------------------------------------------------------------------------------------------------------------------|-------------------------|
| DH5 $\alpha$          | A host for plasmid cloning.                                                                                                                                           | Our lab                 |
| MG1655                | Strain K-12, $F^- \lambda^- rph-1$ .                                                                                                                                  | Our lab                 |
| MG1655 $\Delta ydiV$  | <i>ydiV</i> deletion mutant of MG1655.                                                                                                                                | This study              |
| MG1655 $\Delta slyD$  | <i>slyD</i> deletion mutant of MG1655.                                                                                                                                | This study              |
| MG1655 $\Delta fur$   | <i>fur</i> deletion mutant of MG1655.                                                                                                                                 | This study              |
| BL21(DE3)             | $F'$ <i>ompT hsdS<sub>B</sub></i> ( $rB^- mB^-$ ) <i>gal dcm met</i> (DE3).                                                                                           | Our lab                 |
| BL21 $\Delta ydiV$    | <i>ydiV</i> deletion mutant of BL21(DE3).                                                                                                                             | This study              |
| BL21 $\Delta slyD$    | <i>slyD</i> deletion mutant of BL21(DE3).                                                                                                                             | This study              |
| BL21 $\Delta fur$     | <i>fur</i> deletion mutant of BL21(DE3).                                                                                                                              | This study              |
| UPEC CFT073           | Wild type.                                                                                                                                                            | Shigan Yan <sup>a</sup> |
| UPEC $\Delta ydiV$    | <i>ydiV</i> deletion mutant of UPEC CFT073.                                                                                                                           | This study              |
| UPEC $\Delta slyD$    | <i>slyD</i> deletion mutant of UPEC CFT073.                                                                                                                           | This study              |
| BTH101                | $F'$ , <i>cya-99</i> , <i>araD139</i> , <i>galE15</i> , <i>galK16</i> , <i>rpsL1</i> (Str <sup>R</sup> ), <i>hsdR2</i> , <i>mcrA1</i> , <i>mcrB1</i> , <i>relA1</i> . | Beile Gao <sup>b</sup>  |

117 <sup>a</sup>Qilu University of Technology. <sup>b</sup>Chinese Academy of Sciences, South China Sea Institute of  
 118 Oceanology.

119

120 **Supplementary Table S2.** Oligonucleotides used in this study for gene knockout. The letters  
 121 with underline represented homologous sequences for recombination.

| Oligonucleotides    | Sequence                                                                                                               |
|---------------------|------------------------------------------------------------------------------------------------------------------------|
| Gene knockout       |                                                                                                                        |
| <i>ydiV</i> -Kan-F  | <u>ATCCCTTTTAGCCGGATACTGAAAAACATCCTTCGAGAGGGACGGT</u><br><u>TACCGTGTAGGCTGGAGCTGCTTC</u>                               |
| <i>ydiV</i> -Kan-R  | <u>TTGATAGTGTAGACGGTTACTCTCGTCTTAAACACCAGCAAACAGA</u><br><u>AGGGATGGGAATTAGCCATGGTCC</u>                               |
| <i>slyD</i> -Kan-F  | <u>TTAAGCTAGTGAGTACACGGCTGCAGAATTCCGCTACAATCTGCG</u><br><u>CCACTATTCTTCCCATGCTCAGGAGATATCGTGTAGGCTGGAGCT</u><br>GCTTC  |
| <i>slyD</i> -Kan-R  | <u>CGGTATTAGTGGCAACCGCAACCGCCGTTGCCTTACC GCCACAG</u><br><u>CAGCCTTCGCCACCGTGTTTCATGACCGTGAATGGGAATTAGCCAT</u><br>GGTCC |
| <i>fur</i> -Kan-F   | <u>TGTCACCTTCTTCTAATGAAGTGAACCGCTTAGTAACAGGACAGATT</u><br><u>CCGCGTGTAGGCTGGAGCTGCTTC</u>                              |
| <i>fur</i> -Kan-R   | <u>CTTGCATAAAAAAGCCAACCCGCAGGTTGGCTTTTCTCGTTCAGGC</u><br><u>TGGCATGGGAATTAGCCATGGTCC</u>                               |
| Gene test           |                                                                                                                        |
| <i>ydiV</i> -test-F | GCCCCGTGAAACCAAACAAC                                                                                                   |
| <i>ydiV</i> -test-R | GCCTCACTGGCGAGACTTT                                                                                                    |
| <i>slyD</i> -test-F | ATATGCGGATGCTGCGAGAG                                                                                                   |
| <i>slyD</i> -test-R | CATATCTCCAGGATCGGGGC                                                                                                   |
| <i>fur</i> -test-F  | GCGGGCTATCATTTCGAAGC                                                                                                   |
| <i>fur</i> -test-R  | ACCATCTTCTGATGCCCGAC                                                                                                   |

**Supplementary Table S3.** Plasmids used in this study.

| Plasmids              | Relevant characteristics                                                                                                                       | Source                    |
|-----------------------|------------------------------------------------------------------------------------------------------------------------------------------------|---------------------------|
| pTKRED                | Gene knockout plasmid, expression of three $\lambda$ -Red recombination enzyme.                                                                | Qingsheng Qi <sup>a</sup> |
| pCP20                 | Resistance gene remove plasmid, expression of flippase recombination enzyme.                                                                   | Qingsheng Qi <sup>a</sup> |
| pKD4                  | Amplification the kanamycin gene cassettes flanked by FRT recognition target sites.                                                            | Qingsheng Qi <sup>a</sup> |
| pTrac99a              | Cloning vector, <i>trc</i> promoter, <i>ColE1</i> ori, <i>Amp</i> .                                                                            | Qingsheng Qi <sup>a</sup> |
| pTracydiV             | <i>ydiV</i> from MG1655 cloned into pTrac99a vector.                                                                                           | This study                |
| pBAD24                | Cloning vector, <i>araBAD</i> promoter, <i>f1</i> ori, <i>Amp</i> .                                                                            | Our lab                   |
| pBADydiV              | <i>ydiV</i> from MG1655 cloned into pBAD24 vector.                                                                                             | This study                |
| pCL1920               | Cloning vector, <i>lac</i> promoter, <i>pSC101</i> ori, <i>spc</i> .                                                                           | Qingsheng Qi <sup>a</sup> |
| pCL <i>fepAp-lacZ</i> | <i>fepA</i> promoter from MG1655 and <i>lacZ</i> cloned into pCL1920 vector instead of <i>lac</i> promoter.                                    | This study                |
| pCL <i>fhuFp-lacZ</i> | <i>fhuF</i> promoter from MG1655 and <i>lacZ</i> cloned into pCL1920 vector instead of <i>lac</i> promoter.                                    | This study                |
| pGL01                 | Expression vector, <i>T7 lac</i> promoter, N-terminal His tag, PPase cleavage site between the His-tag and the expressed protein, <i>Amp</i> . | Our lab                   |
| pGL01ydiV             | YdiV protein expression construct into pGL01 vector, N-terminal His tag.                                                                       | This study                |
| pGL01slyD             | SlyD protein expression construct into pGL01 vector, N-terminal His tag.                                                                       | This study                |
| pGL01fur              | Fur protein expression construct into pGL01 vector, N-terminal His tag.                                                                        | This study                |
| pGL01fur P18A         | Fur P18A mutant protein expression construct into pGL01 vector, N-terminal His tag.                                                            | This study                |
| pGL01fur P29A         | Fur P29A mutant protein expression construct into pGL01 vector, N-terminal His tag.                                                            | This study                |
| pACYCDuet-1           | Expression vector, <i>T7 lac</i> promoter, N-terminal His tag, <i>cmr</i> .                                                                    | Our lab                   |
| pACYCydiV             | YdiV protein expression construct into pACYCDuet-1 vector, no tag.                                                                             | This study                |
| pET29b                | Expression vector, <i>T7 lac</i> promoter, c-terminal His tag, <i>Kan</i> .                                                                    | Our lab                   |
| pET29bslyD            | SlyD protein expression construct into pET29b vector, no tag.                                                                                  | This study                |
| pydiV                 | <i>ydiV</i> from UPEC cloned into pCL1920 vector.                                                                                              | This study                |
| pslyD                 | <i>slyD</i> from UPEC cloned into pCL1920 vector.                                                                                              | This study                |
| pKT25                 | <i>lac</i> promoter, <i>p15A</i> ori, N-terminal T25, <i>Kan</i> .                                                                             | Beile Gao <sup>b</sup>    |
| pUT18C                | <i>lac</i> promoter, <i>ColE1</i> ori, N-terminal T18, <i>Amp</i> .                                                                            | Beile Gao <sup>b</sup>    |
| pKNT25                | <i>lac</i> promoter, <i>p15A</i> ori, C-terminal T25, <i>Kan</i> .                                                                             | Beile Gao <sup>b</sup>    |
| pCH363                | <i>lac</i> promoter, <i>pBR322</i> ori, C-terminal T18, <i>Amp</i> .                                                                           | Beile Gao <sup>b</sup>    |

|                     |                                                                                               |                        |
|---------------------|-----------------------------------------------------------------------------------------------|------------------------|
| pKT25- <i>zip</i>   | The leucine zipper region of the GCN4 from yeast cloned into pKT25 vector. Positive control.  | Beile Gao <sup>b</sup> |
| pUT18C- <i>zip</i>  | The leucine zipper region of the GCN4 from yeast cloned into pUT18C vector. Positive control. | Beile Gao <sup>b</sup> |
| pKNT25- <i>slyD</i> | <i>slyD</i> from <i>MG1655</i> cloned into pKNT25 vector.                                     | This study             |
| pKNT25- <i>ydiV</i> | <i>ydiV</i> from <i>MG1655</i> cloned into pKNT25 vector.                                     | This study             |
| pCH363- <i>ydiV</i> | <i>ydiV</i> from <i>MG1655</i> cloned into pCH363 vector.                                     | This study             |
| pUT18C- <i>fur</i>  | <i>fur</i> from <i>MG1655</i> cloned into pUT18C vector.                                      | This study             |

123 <sup>a</sup>Shandong University. <sup>b</sup>Chinese Academy of Sciences, South China Sea Institute of  
124 Oceanology.

125

126 **Supplementary Table S4.** Oligonucleotides used in this study for plasmid construction. The  
127 letters with underline represented homologous sequences for recombination.

| Oligonucleotides    | Sequence                                                          |
|---------------------|-------------------------------------------------------------------|
| pTrac99a-F          | CGAGAGTAGGGA <sup>ACTGCCAG</sup>                                  |
| pTrac99a-R          | GGTCTGTTT <sup>CCTGTGTGAAATTG</sup>                               |
| pTracydiV-F         | <u>AACAATTT</u> CACACAGGAAACAGACCATGAAGATTTTTTTGGAGAATC<br>TTTATC |
| pTracydiV-R         | <u>ATGCCTGGCAGTTCCCTACTCTCGTTATCGCTGAACCAACGTCGTTA</u><br>TCTG    |
| pBAD24-F            | AAGCTTGGCTGTTTTGGCGGATGAG                                         |
| pBAD24-R            | GAATTCCTCCTGCTAGCCCAAAAAACG                                       |
| pBADydiV-F          | <u>TTTTTTGGGCTAGCAGGAGGAATTCATGAAGATTTTTTTGGAGAATCT</u><br>TTATC  |
| pBADydiV-R          | <u>CTCATCCGCCAAAACAGCCAAGCTTTTATCGCTGAACCAACGTCGTT</u><br>ATCTG   |
| pCL1920-Np-F        | TAAGCCAGCCCCGACACC                                                |
| pCL1920-Np-R        | ACGCGAATTC <sup>CCGACAGTAAGA</sup>                                |
| pCL <i>fepAp</i> -F | <u>TTACTGTCGGGAATTCGCGTACCATAACCCCATGTTTACTGTG</u>                |
| pCL <i>fepAp</i> -R | <u>GAATCCGTAATCATGGTCATTGTTTTATTCTGCATTTTTGCCAC</u>               |
| pCL <i>fhuFp</i> -F | <u>TTACTGTCGGGAATTCGCGTAATCCGCCACTGATCTGACG</u>                   |
| pCL <i>fhuFp</i> -R | <u>GAATCCGTAATCATGGTCATAATCGGGATAGTAATCTAAATGATAATG</u>           |
| pCL <i>lacZ</i> -F  | <u>GGCAAAAATGCAGGAATAAAACAATGACCATGATTACGGATTCACTG</u><br>G       |
| pCL <i>lacZ</i> -R  | <u>CGGGTGTCTGGGGCTGGCTTATTATTTTTGACACCAGACCAACTGG</u>             |
| pGL01-F             | CTCGAGTCTGGTAAAGAAAC                                              |
| pGL01-R             | GGATCCGGGCCCTGGAA                                                 |
| pGL01ydiV-F         | <u>TTCCAGGGGCCCGGATCCATGAAGATTTTTTTGGAGAATCTTTATC</u>             |
| pGL01ydiV-R         | <u>TTCTTTACCAGACTCGAGTTATCGCTGAACCAACGTCGTTATCTG</u>              |
| pGL01slyD-F         | <u>TTCCAGGGGCCCGGATCCATGAAAGTAGCAAAGACCTGGTG</u>                  |
| pGL01slyD-R         | <u>TTCTTTACCAGACTCGAGTTAGTGGCAACCGCAACCG</u>                      |
| pGL01fur-F          | <u>TTCCAGGGGCCCGGATCCATGACTGATAACAATACCGCCCT</u>                  |
| pGL01fur-R          | <u>TTCTTTACCAGACTCGAGTTATTTGCCTTCGTGCGCATGTT</u>                  |
| pGL01fur-P18A-F     | CCTGAAAGTAACGCTTGCCCGTTTAAAAATCCTGGAAGTTCTTCAGG                   |



|                          |                                                                  |
|--------------------------|------------------------------------------------------------------|
| pGL01 <i>fur</i> -P18A-R | GGCAAGCGTTACTTTTCAGGCCAGCTTTCTTTAGGGCG                           |
| pGL01 <i>fur</i> -P29A-F | GGCCGACAACCATCACGTCAGTGCGGAAGATTTATACAAACG                       |
| pGL01 <i>fur</i> -P29A-R | ACGTGATGGTTGTCCGGCCTCCTGAAGAACTTCCAGGATTTTTAAAC                  |
| pACYCDuet-1-F            | TAATTAACCTAGGCTGCTGCCAC                                          |
| pACYCDuet-1-R            | GGTATATCTCCTTATTAAAGTTAAACAAAATTATTTCTAC                         |
| pACYC <i>ydiV</i> -F     | <u>TTTAACTTTAATAAGGAGATATACCATGAAGATTTTTTTGGAGAATCTT</u><br>TATC |
| pACYC <i>ydiV</i> -R     | <u>GTGGCAGCAGCCTAGGTTAATTATTATCGCTGAACCAACGTCGTTAT</u><br>CTG    |
| pET29b-F                 | CTCGAGCACCACCACCACCACCCTGAGATCCGGCTGCTAACAAAG<br>C               |
| pET29b-R                 | CATATGTATATCTCCTTCTTAAAGTTAAACAAAATTATTTCTAGAGGGG<br>AATT        |
| pET29b <i>slyD</i> -F    | <u>GAAGGAGATATACATATGAAAGTAGCAAAGACCTGGTG</u>                    |
| pET29b <i>slyD</i> -R    | <u>GTGGTGGTGGTGTCTCGAGTTAGTGGCAACCGCAACCG</u>                    |
| pCL1920-F                | TAAGCCAGCCCCGACACC                                               |
| pCL1920-R                | AGCTGTTTCCTGTGTGAAATTGTTA                                        |
| pCL1920 <i>ydiV</i> -F   | <u>ATTTACACAGGAAACAGCTATGAAGATTTTTTTGGAGAATCTTTATC</u>           |
| pCL1920 <i>ydiV</i> -R   | <u>CGGGTGTCTGGGGCTGGCTTATTATCGCTGAACCAACGTCGTTATCT</u><br>G      |
| pCL1920 <i>slyD</i> -F   | <u>ATTTACACAGGAAACAGCTATGAAAGTAGCAAAGACCTGGTG</u>                |
| pCL1920 <i>slyD</i> -R   | <u>CGGGTGTCTGGGGCTGGCTTATTAGTGGCAACCGCAACCG</u>                  |
| pUT18C-F                 | TAATATGGTGCCTCTCAGTACAATCTGCTC                                   |
| pUT18C-R                 | CTCGAGATCTAGAGTCGACCTGCA                                         |
| pUT18C- <i>fur</i> -F    | <u>GGTCGACTCTAGATCTCGAGATGACTGATAACAATACCGCCCT</u>               |
| pUT18C- <i>fur</i> -R    | <u>ACTGAGAGTGCACCATATTA</u> TTATTTGCCTTCGTGCGCATGTT              |
| pKNT25-F                 | TGCAGGTCTGACTCTAGAGGATCCC                                        |
| pKNT25-R                 | GGCATGCAAGCTTGGCGTAAT                                            |
| pKNT25- <i>slyD</i> -F   | <u>ACGCCAAGCTTGCATGCCATGAAAGTAGCAAAGACCTGGTG</u>                 |
| pKNT25- <i>slyD</i> -R   | <u>TCCTCTAGAGTCGACCTGCA</u> GTGGCAACCGCAACCG                     |
| pKNT25- <i>ydiV</i> -F   | <u>ACGCCAAGCTTGCATGCCATGAAGATTTTTTTGGAGAATCTTTATC</u>            |
| pKNT25- <i>ydiV</i> -R   | <u>TCCTCTAGAGTCGACCTGCA</u> TCGCTGAACCAACGTCGTTATCTG             |
| pCH363-F                 | ATTACGCCAAGCTTGCATGCC                                            |
| pCH363-R                 | CATGGTCATAGCTGTTTCCTGTGTG                                        |
| pCH363- <i>ydiV</i> -F   | <u>AGGAAACAGCTATGACCATGATGAAGATTTTTTTGGAGAATCTTTATC</u>          |
| pCH363- <i>ydiV</i> -R   | <u>GCATGCAAGCTTGGCGTAATTCGCTGAACCAACGTCGTTATCTG</u>              |

128  
129  
130  
131  
132  
133  
134  
135

136 **Supplementary Table S5.** Primers used in real-time quantitative PCR.

| Gene        | Forward sequence (5'→3')   | Reverse sequence (5'→3') |
|-------------|----------------------------|--------------------------|
| <i>gapA</i> | AACTGAATGGCAAACACTGACTGGTA | TTTCATTTTCGCCTTCAGCAGC   |
| <i>fur</i>  | ACTGACACAGCAACATCACCACG    | ACTGTGGTTAGTCAGGCGAATGC  |
| <i>ydiV</i> | GCAACTTACCGAGGAGCAACAT     | CCTTCATTGAGATGCGGGTAA    |
| <i>slyD</i> | TCACTGCGGTTGAAGACGAT       | TGAACGTGACCATGAGCCAG     |
| <i>fepA</i> | AACCTGACCGGTAACCTCCACCA    | GGCACCCAGGAAGTATCACCAC   |
| <i>fhuF</i> | TGCTGGAGTTTATCCGCCTG       | TCATCATCGGTTGGTTGCGA     |
| <i>fecB</i> | CCCCTATCGCGAAGAGAGCAT      | TAAGCGGCTGATGGTGAAGAT    |

137

138 **Supplementary Table S6.** Representative MS analysis of His-Fur pull-down.

| Accession  | Gene        | Coverage | Peptides | Gene product or Function                                                   |
|------------|-------------|----------|----------|----------------------------------------------------------------------------|
| A0A0G3HUH8 | <i>fur</i>  | 93.91    | 20       | Ferric iron uptake regulon transcriptional repressor.                      |
| A0A0G3HNG0 | <i>ydiv</i> | 72.99    | 12       | Anti-FlhD <sub>4</sub> C <sub>2</sub> factor, inactive EAL family protein. |
| A0A0G3HX96 | <i>flhd</i> | 97.41    | 10       | Flagellar transcriptional regulator.                                       |
| A0A0S1EZY8 | <i>slyD</i> | 35.71    | 4        | Peptidyl-prolyl cis-trans isomerase.                                       |
| P0ACJ8     | <i>crp</i>  | 41.42    | 8        | cAMP-activated global transcriptional regulator.                           |
| A0A0G3I191 | <i>fbaA</i> | 18.66    | 4        | Class II fructose-bisphosphate aldolase.                                   |
| P27250     | <i>ahr</i>  | 8.55     | 2        | Aldehyde reductase Ahr.                                                    |
| A0A0G3I0D1 | <i>rplN</i> | 26.82    | 3        | 50S ribosomal protein L14.                                                 |
| P0A7L8     | <i>rpmA</i> | 29.41    | 2        | 50S ribosomal protein L27.                                                 |
| P64588     | <i>yqjI</i> | 18.35    | 4        | Transcriptional regulator YqjI.                                            |
| P0A991     | <i>fbaB</i> | 18.57    | 5        | Fructose-bisphosphate aldolase class 1.                                    |
| P0A836     | <i>sucC</i> | 7.21     | 3        | Succinyl-CoA ligase [ADP-forming] subunit beta.                            |
| A0A0G3HML4 | <i>rpmB</i> | 24.35    | 2        | 50S ribosomal protein L28.                                                 |
| A0A0G3HMH5 | <i>gatD</i> | 9.53     | 3        | Galactitol-1-phosphate 5-dehydrogenase.                                    |
| P06610     | <i>btuE</i> | 18.03    | 2        | Vitamin B12 transport periplasmic protein BtuE.                            |
| P62399     | <i>rplE</i> | 22.34    | 3        | 50S ribosomal protein L5.                                                  |

139
